# Supplementary material for: Piperlongumine Acts as an Immunosuppressant by Exerting Prooxidative Effects in Human T Cells Resulting in Diminished TH17 but Enhanced Treg Differentiation
Source: PubMed Central journal article supplement (PMC7303365; doi:10.3389/fimmu.2020.01172), 2020-06-12
Supplement: Data_Sheet_1.pdf [file Data_Sheet_1.pdf]

## *Supplementary Material*

# **Piperlongumine acts as an immunosuppressant by exerting prooxidative effects in human T cells resulting in diminished T<sub>H</sub>17 but enhanced T<sub>reg</sub> differentiation**

**Jie Liang<sup>1,2</sup>, Jacqueline D. Ziegler<sup>1</sup>, Beate Jahraus<sup>1</sup>, Christian Orlik<sup>1</sup>, Renata Blatnik<sup>3</sup>, Norbert Blank<sup>4</sup>, Beate Niesler<sup>5,6</sup>, Guido Wabnitz<sup>1</sup>, Thomas Ruppert<sup>3</sup>, Katrin Hübner<sup>1</sup>, Emre Balta<sup>1</sup>, and Yvonne Samstag<sup>1\*</sup>**

\*Correspondence: yvonne.samstag@urz.uni-heidelberg.de

## **1 Supplementary Data**

### **LC-MS measurements**

Nanoflow LC-MS analysis was performed with a NanoAcquity UPLC liquid chromatography (Waters, Eschborn, Germany) system coupled to an Orbitrap XL or with an Ultimate 3000 liquid chromatography system coupled to an Orbitrap Q Exactive mass spectrometer (Thermo-Fischer, Bremen, Germany). When analyzed on the NanoAcquity UPLC – Orbitrap XL mass spectrometer, samples were loaded to a NanoAcquity Symmetry C18 Trap column (particle size 5 µm, inner diameter 180 µm x 20 mm, Waters) at a flow of 15 µL/min for 5 min of 0.5 % solvent B. Peptides were separated using a NanoAcquity M-Class peptide BEH C18 analytical column (particle size 1.7 µm, inner diameter 75 µm x 250 mm, Waters) with a 30 min linear gradient (3-40 % B) with a flow rate of 300 nL/min. Solvent A was 0.1% formic acid (FA; ProteoChem, Denver, CO, USA) in H<sub>2</sub>O (Biosolve) and solvent B was composed of 0.1% FA (ProteoChem), 10% H<sub>2</sub>O (Biosolve) and 89.9 % ACN (Biosolve). The mass spectrometer was operated in data-dependent acquisition mode, automatically switching between MS and MS<sup>2</sup>. MS spectra (m/z 400–1600) were acquired in the Orbitrap at 60,000 (m/z 400) resolution. Collision induced dissociation MS<sup>2</sup> spectra were generated for up to 10 precursors with normalized collision energy of 35 % in the ion trap. When analyzed on the Ultimate 3000 – Q Exactive mass spectrometer, samples were delivered to an in-house packed analytical column (inner diameter 75 µm x 20 cm; CS – Chromatographie Service GmbH, Langerwehe, Germany) filled with 1.9 µm ReprisilPur-AQ 120 C18 material (Dr. Maisch, Ammerbuch-Entringen, Germany). Solvent A was 0.1 % formic acid (FA; ProteoChem, Denver, CO, USA) in H<sub>2</sub>O (Biosolve) and solvent B was composed of 0.1 % FA (ProteoChem), 10 % H<sub>2</sub>O (Biosolve) and 89.9 % ACN (Biosolve). Sample was loaded to the analytical column for 20 min with 3 % B at 550 nL/min flow rate. Peptides were separated with a 30 min linear gradient (3-40 % B) with a flow rate of 300 nL/min. The mass spectrometer was operated in data-dependent acquisition mode, automatically switching between MS, acquired at 60,000 (m/z 400) resolution, and MS<sup>2</sup> spectra, generated for up to 15 precursors with normalized collision energy of 27 % in the HCD cell and measured in the Orbitrap at 15,000 resolution.

## **2 Supplementary Figures**

## 2.1 Supplementary Figure 1

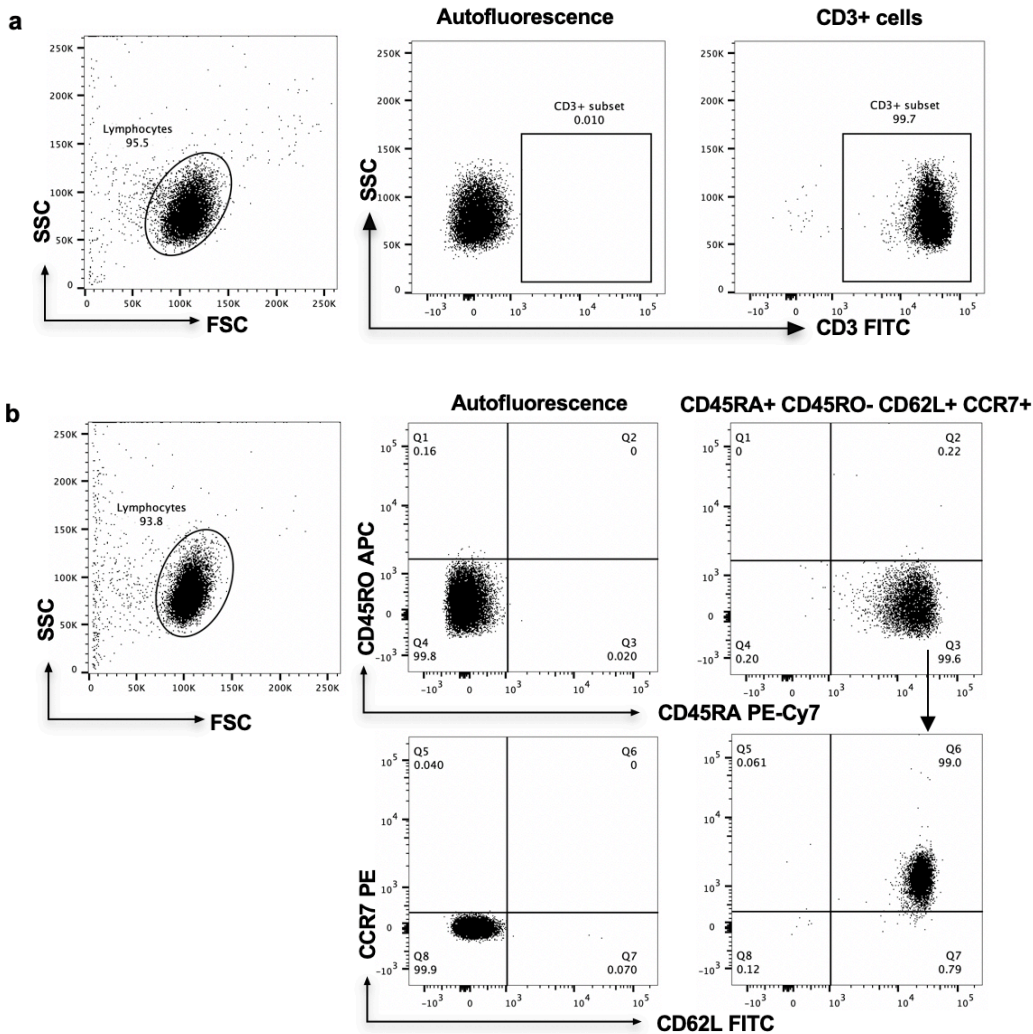

**Supplementary Figure 1. Purity of MACS-separated primary human pan-T cells and naïve CD4<sup>+</sup> cells** (a) Purified primary human pan-T cells were stained with CD3, and detected by the flow cytometry. (b) Purified primary human naïve CD4<sup>+</sup> cells were stained with CD45RA, CD45RO, CCR7, CD62L, and analysed with flow cytometry. Representative flow cytometry plots show the gating strategy.

## 2.2 Supplementary Figure 2

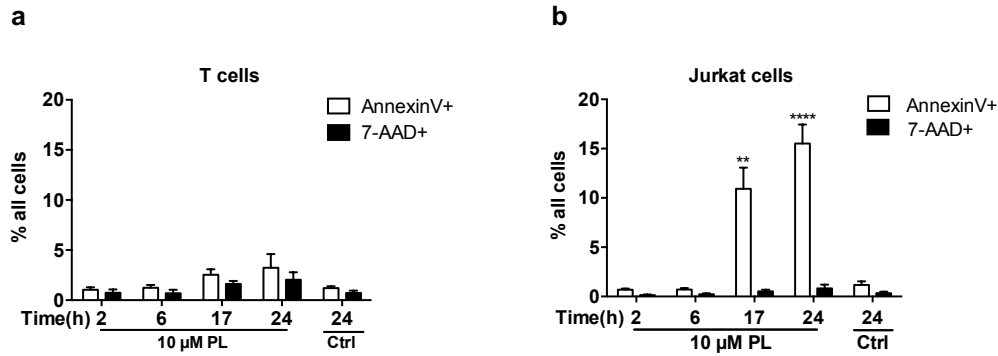

**Supplementary Figure 2. PL is not cytotoxic to primary human T cells but to Jurkat cells (a)** Primary human T cells or **(b)** Jurkat cells were treated with DMSO (Ctrl) or 10 μM PL for the indicated time points and then stained with AnnexinV and 7-AAD. Signals were detected by flow cytometry. Shown are the quantification of early apoptotic (AnnexinV+) or dead (7-AAD+) cells from the whole cell population ( $n = 3$ ; mean; SEM; \*\* $p < 0.01$ , \*\*\*\* $p < 0.0001$ ).

### 2.3 Supplementary Figure 3

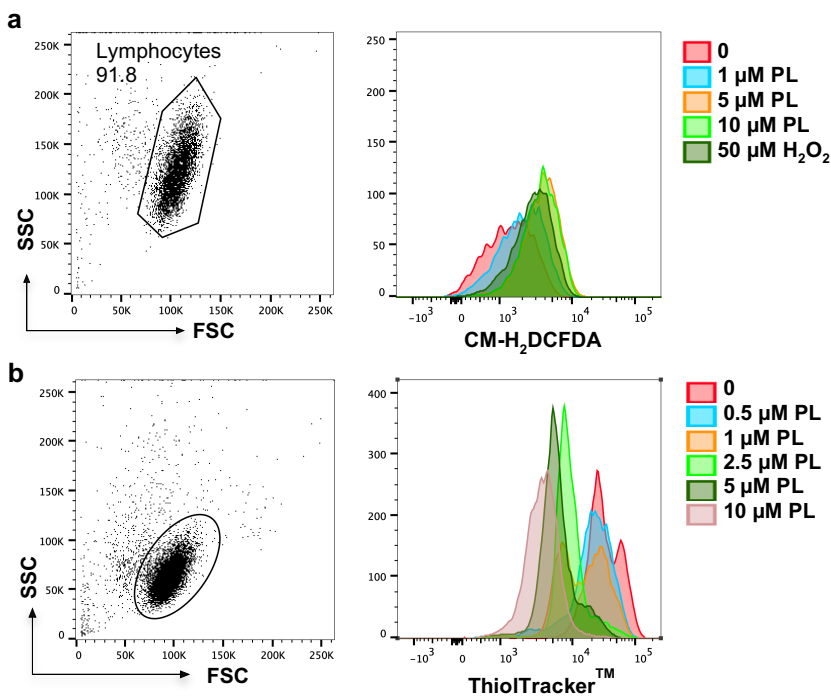

**Supplementary Figure 3. Flow cytometry analysis of intracellular ROS and GSH in T cell.** Representative dot plots showing gating on viable T cells (left panels) and histograms showing the MFI of the respective dyes for **(a)** CM-H<sub>2</sub>DCFDA (ROS) and **(b)** ThiolTracker™ (GSH) staining.

## 2.4 Supplementary Figure 4

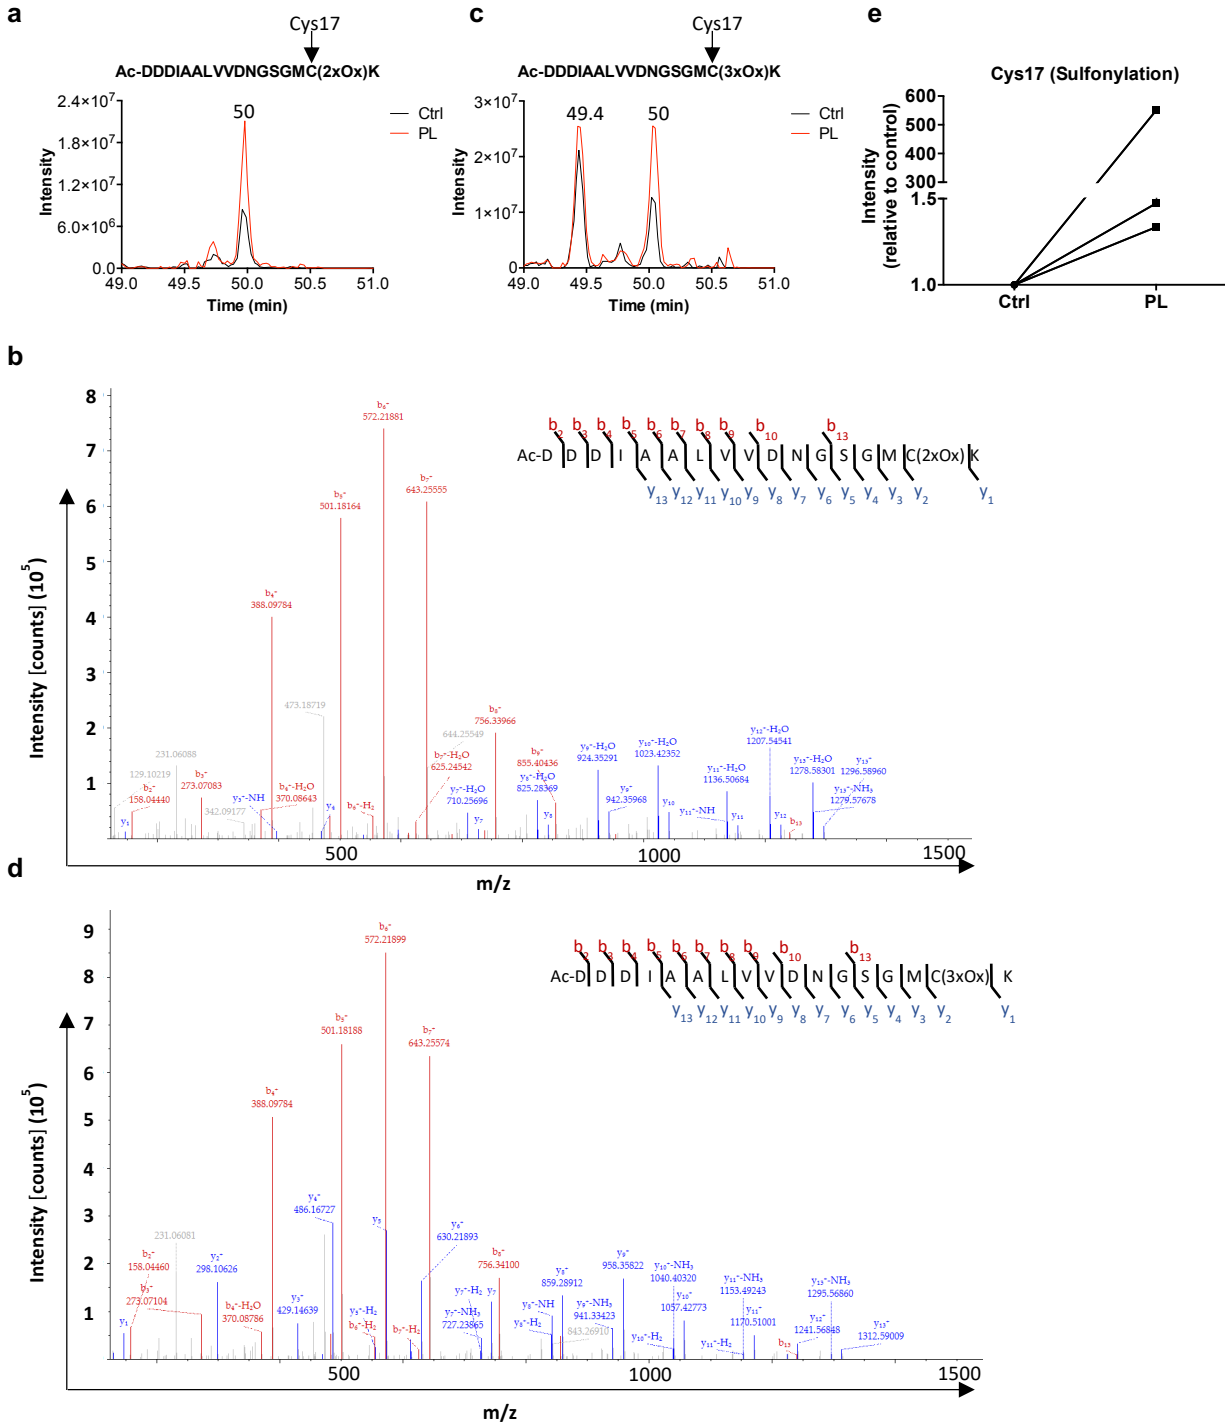

**Supplementary Figure 4. PL oxidizes Cys17 in peptide Ac-DDDIAALVVDNGSGMCK of actin (a, c)** Elution profile of peptide Ac-DDDIAALVVDNGSGMCK of actin in control and PL-treated samples with oxidation of Cys17 to (a) sulfinic (2xOx) or (c) sulfonic (3xOx) acid. Both peptides eluted at 50.0 min in control and PL-treated samples. Signal intensities increased for both peptides with PL-treatment. Chromatographic peak identities were confirmed with MS<sup>2</sup> spectra.

Peak areas calculated with the Skyline software were used for relative quantification of peptides. **(b, d)** MS<sup>2</sup> for the peptide Ac-DDDIAALVVDNGSGMCK of actin with oxidation of Cys17 to **(b)** sulfinic (2xOx) or **(d)** sulfonic (3xOx) acid. MS<sup>2</sup> spectra for both peptides were identified at 50.0 min. Both peptides were detected with cleaved N-terminal methionine and N-terminal acetylation on the first aspartic acid. Peptide sequence with vertical lines represents detected MS<sup>2</sup> ions and peptide sequence coverage. Red and blue peaks in MS<sup>2</sup> spectra represent b and y ions, respectively. **(e)** Sulfonylated (SO<sub>3</sub>H) form of Cys17 in peptide Ac-DDDIAALVVDNGSGMCK of actin was higher upon PL treatment compared to the control in three biological replicates (*n* = 3). The intense signal at 49.4 min in (C) is a different peptide sharing the same precursor mass.

## 2.5 Supplementary Figure 5

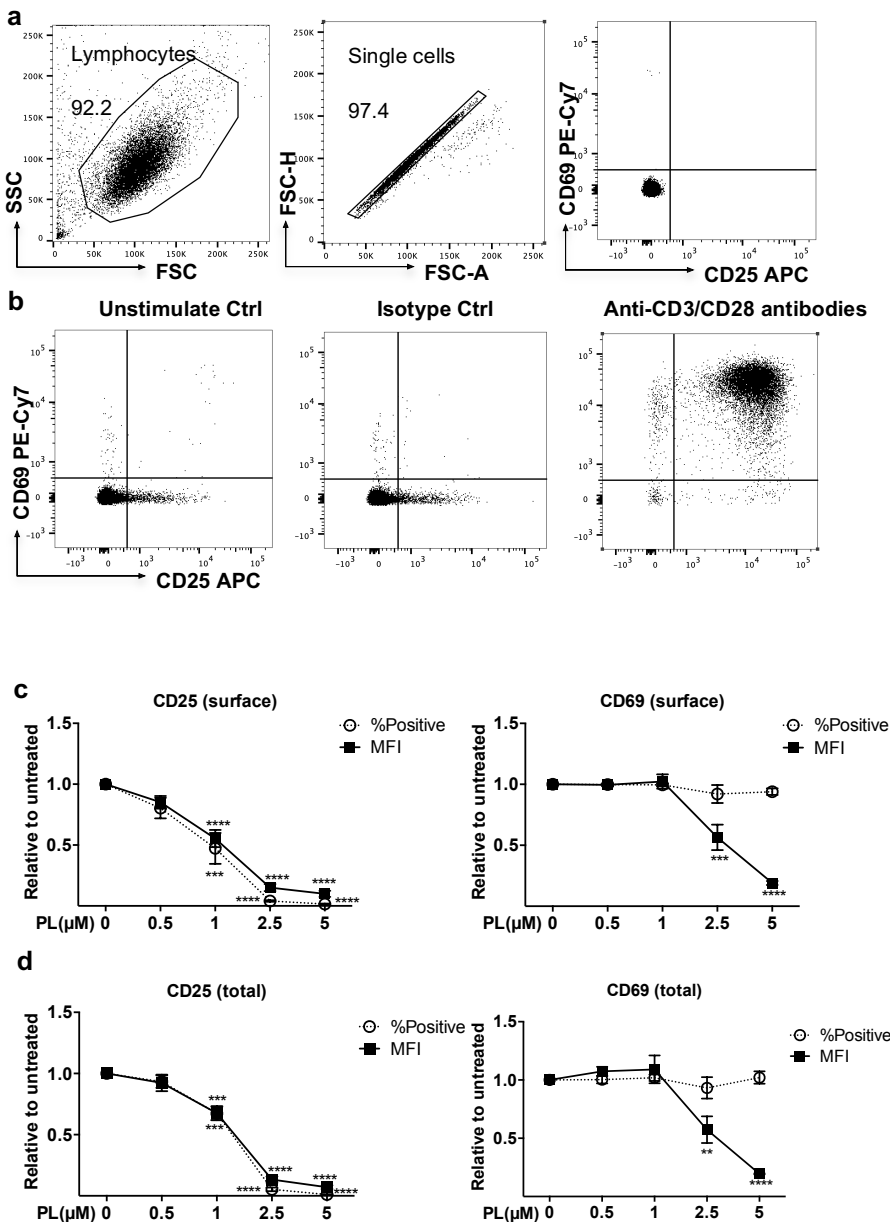

**Supplementary Figure 5. PL inhibits the expression of costimulation-induced CD25 and CD69 in T cells** (a) Representative flow cytometry dot plots show the gating strategy for CD25 and CD69 stained T cells. (b) Representative flow cytometry dot plots of CD25 and CD69 stained T cells, which are unstimulated, stimulated with anti-CD3/CD28 antibodies or isotype control antibodies. Flow cytometry analysis of CD25 (left) and CD69 (right) (c) surface and (d) total expression in T cells after stimulation with anti-CD3/CD28 antibodies for 24 h. Given are expression levels relative to control in terms of % positive cells and MFI ( $n = 3$ ; mean; SEM;  $**p < 0.01$ ,  $***p < 0.001$ ,  $****p < 0.0001$ ).

## 2.6 Supplementary Figure 6

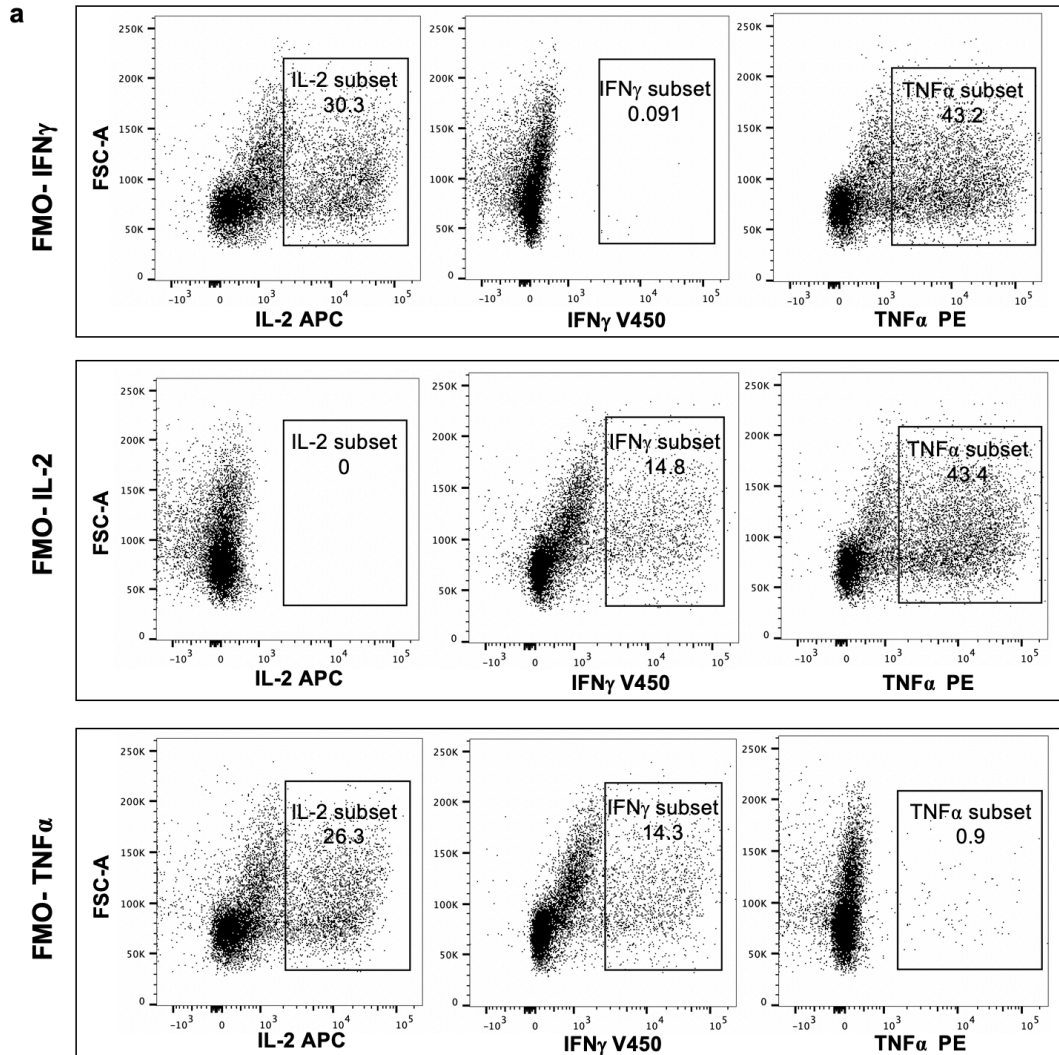

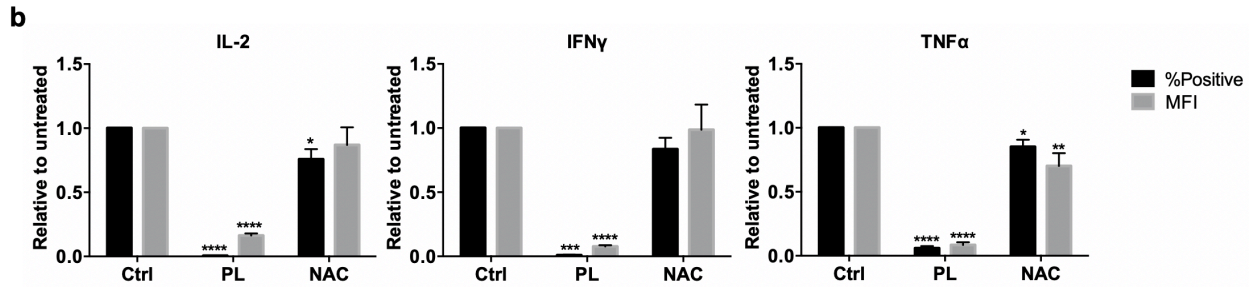

**Supplementary Figure 6. Intracellular staining of IL-2, IFN $\gamma$  and TNF $\alpha$  (a)** Representative flow cytometry dot plots (Florescence Minus One (FMO)). **(b)** Quantification of IFN $\gamma$ , TNF $\alpha$  and IL-2 detected by intracellular cytokine staining. Shown are ratios of 5  $\mu$ M PL-treated or NAC-treated cells to the untreated control with regard to the % positive cells (black bars) and MFI (grey bars) ( $n = 3$ ; mean; SEM; \* $p < 0.05$ , \*\* $p < 0.01$ , \*\*\* $p < 0.001$ , \*\*\*\* $p < 0.0001$ ).

## 2.7 Supplementary Figure 7

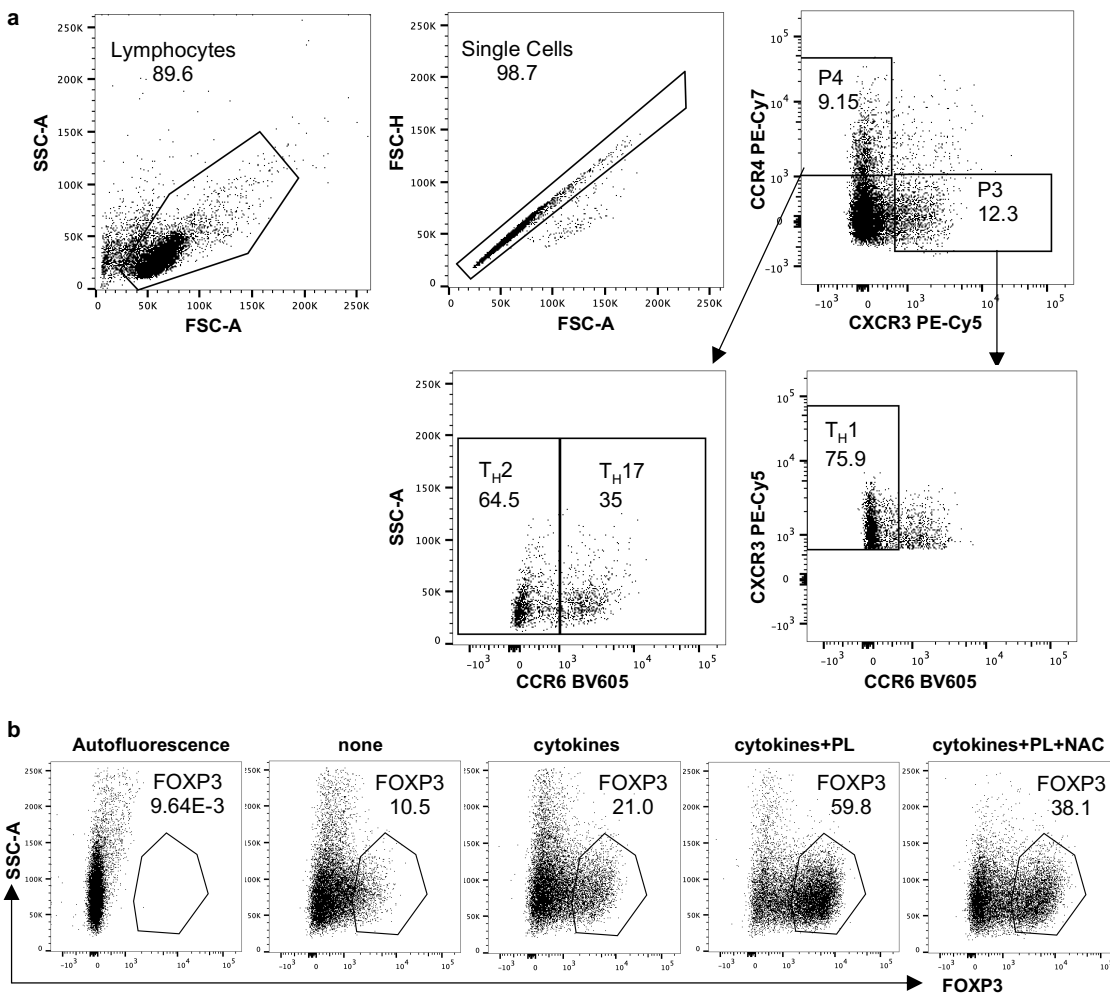

**Supplementary Figure 7. Gating strategies for different T cell subtypes (a)** The gating strategy for  $T_H1$ ,  $T_H2$  and  $T_H17$  cells. **(b)** Representative flow cytometry dot plots of FOXP3-positive T cell populations.

## 2.8 Supplementary Figure 8

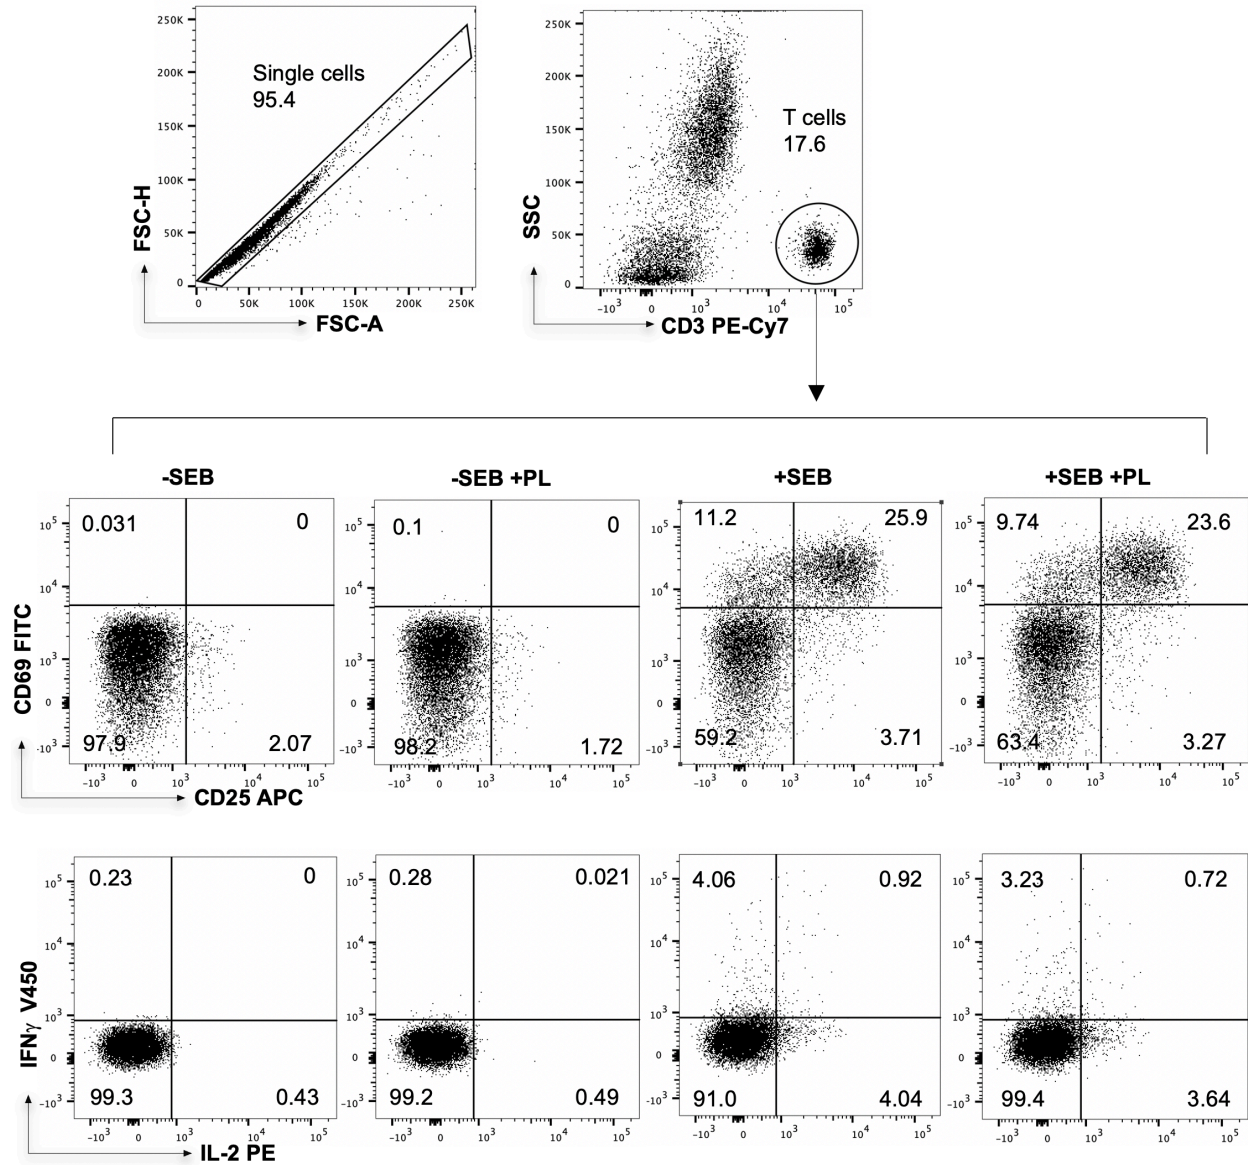

**Supplementary Figure 8. Whole blood from patients.** Gating strategy for T cells (**upper panel**). Representative flow cytometry dot plots showing expression of CD25 and CD69 (**middle panel**), or IFN $\gamma$  and IL-2 (**lower panel**) in T cells of patients with or without 20 h of 5  $\mu$ M PL treatment.
